# Supplementary material for: A multilayer approach and its application to model a local gravimetric quasi-geoid model over the North Sea: QGNSea V1.0
Source: Copernicus journal article supplement (doi:10.5194/gmd-11-4797-2018), 2018-12-03
Supplement: Supplementary file 1 [file gmd-11-4797-2018-supplement.zip]

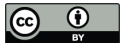

## *Supplement of*

# **A multilayer approach and its application to model a local gravimetric quasi-geoid model over the North Sea: QGNSea V1.0**

**Yihao Wu et al.**

*Correspondence to:* Yihao Wu (yihao.wu@hhu.edu.cn) and Chuang Xu (chuangxu@hust.edu.cn)

- gmd-11-4797-2018-supplement-title-page.pdf
- code
  - MATHSLIB.f90
  - SCF\_MOY\_Ramillien.f90
  - SCF\_rowlands.f90
  - V2X.f90
  - buildline.f90
  - commondata.h
  - correlation.f90
  - legendre.f90
  - main.f90
  - markmidpos.f90
  - matrix\_I.f90
  - ocean0.f90
  - rbfconstypes.h
  - readsetup\_mascon.f90
  - relativeerror.f90

The copyright of individual parts of the supplement might differ from the CC BY 4.0 License.
